# Supplementary material
Source: Elsevier journal article supplement (https://www.sciencedirect.com/science/article/pii/S0300893221002748)
Supplement: mmc1 [file S0300893221002748:mmc1.pdf]

## MATERIAL ADICIONAL

### Tabla 1 del material adicional

#### Lista de verificación PRISMA 2020

| Sección/tema              | Ítem n.º | Ítem de la lista de verificación                                                                                                                                                                                                                          | Localización del ítem en la publicación |
|---------------------------|----------|-----------------------------------------------------------------------------------------------------------------------------------------------------------------------------------------------------------------------------------------------------------|-----------------------------------------|
| <b>TÍTULO</b>             |          |                                                                                                                                                                                                                                                           |                                         |
| Título                    | 1        | Identifique la publicación como una revisión sistemática.                                                                                                                                                                                                 |                                         |
| <b>RESUMEN</b>            |          |                                                                                                                                                                                                                                                           |                                         |
| Resumen estructurado      | 2        | Vea la lista de verificación para resúmenes estructurados de la declaración PRISMA 2020 (tabla 2)                                                                                                                                                         |                                         |
| <b>INTRODUCCIÓN</b>       |          |                                                                                                                                                                                                                                                           |                                         |
| Justificación             | 3        | Describa la justificación de la revisión en el contexto del conocimiento existente.                                                                                                                                                                       |                                         |
| Objetivos                 | 4        | Proporcione una declaración explícita de los objetivos o las preguntas que aborda la revisión.                                                                                                                                                            |                                         |
| <b>MÉTODOS</b>            |          |                                                                                                                                                                                                                                                           |                                         |
| Criterios de elegibilidad | 5        | Especifique los criterios de inclusión y exclusión de la revisión y cómo se agruparon los estudios para la síntesis.                                                                                                                                      |                                         |
| Fuentes de información    | 6        | Especifique todas las bases de datos, registros, sitios web, organizaciones, listas de referencias y otros recursos de búsqueda o consulta para identificar los estudios. Especifique la fecha en la que cada recurso se buscó o consultó por última vez. |                                         |
| Estrategia de búsqueda    | 7        | Presente las estrategias de búsqueda completas de todas las bases de datos, registros y sitios web, incluyendo cualquier filtro y los límites utilizados.                                                                                                 |                                         |

| Sección/tema                                                | Ítem n.º | Ítem de la lista de verificación                                                                                                                                                                                                                                                                                                                                                          | Localización del ítem en la publicación |
|-------------------------------------------------------------|----------|-------------------------------------------------------------------------------------------------------------------------------------------------------------------------------------------------------------------------------------------------------------------------------------------------------------------------------------------------------------------------------------------|-----------------------------------------|
| Proceso de selección de los estudios                        | 8        | Especifique los métodos utilizados para decidir si un estudio cumple con los criterios de inclusión de la revisión, incluyendo cuántos autores de la revisión cribaron cada registro y cada publicación recuperada, si trabajaron de manera independiente y, si procede, los detalles de las herramientas de automatización utilizadas en el proceso.                                     |                                         |
| Proceso de extracción de los datos                          | 9        | Indique los métodos utilizados para extraer los datos de los informes o publicaciones, incluyendo cuántos revisores recopilaron datos de cada publicación, si trabajaron de manera independiente, los procesos para obtener o confirmar los datos por parte de los investigadores del estudio y, si procede, los detalles de las herramientas de automatización utilizadas en el proceso. |                                         |
| Lista de los datos                                          | 10a      | Enumere y defina todos los desenlaces para los que se buscaron los datos. Especifique si se buscaron todos los resultados compatibles con cada dominio del desenlace (por ejemplo, para todas las mediciones, puntos temporales, análisis) y, de no ser así, los métodos utilizados para decidir los resultados que se debían recoger.                                                    |                                         |
|                                                             | 10b      | Enumere y defina todas las demás variables para las que se buscaron datos (por ejemplo, características de los participantes y de la intervención, fuentes de financiación). Describa todos los supuestos formulados sobre cualquier información ausente ( <i>missing</i> ) o incierta.                                                                                                   |                                         |
| Evaluación del riesgo de sesgo de los estudios individuales | 11       | Especifique los métodos utilizados para evaluar el riesgo de sesgo de los estudios incluidos, incluyendo detalles de las herramientas utilizadas, cuántos autores de la revisión evaluaron cada estudio y si trabajaron de manera independiente y, si procede, los detalles de las herramientas de automatización utilizadas en el proceso.                                               |                                         |
| Medidas del efecto                                          | 12       | Especifique, para cada desenlace, las medidas del efecto (por ejemplo, razón de riesgos, diferencia de medias) utilizadas en la síntesis o presentación de los resultados.                                                                                                                                                                                                                |                                         |
| Métodos de síntesis                                         | 13a      | Describa el proceso utilizado para decidir qué estudios eran elegibles para cada síntesis (por ejemplo, tabulando las características de los estudios de intervención y comparándolas con los grupos previstos para cada síntesis (ítem n.º 5).                                                                                                                                           |                                         |
|                                                             | 13b      | Describa cualquier método requerido para preparar los datos para su presentación o síntesis, tales como el manejo de los datos faltantes en los estadísticos de resumen o las conversiones de datos.                                                                                                                                                                                      |                                         |
|                                                             | 13c      | Describa los métodos utilizados para tabular o presentar visualmente los resultados de los estudios individuales y su síntesis.                                                                                                                                                                                                                                                           |                                         |

| Sección/tema                                 | Ítem n.º | Ítem de la lista de verificación                                                                                                                                                                                                                                                       | Localización del ítem en la publicación |
|----------------------------------------------|----------|----------------------------------------------------------------------------------------------------------------------------------------------------------------------------------------------------------------------------------------------------------------------------------------|-----------------------------------------|
|                                              | 13d      | Describa los métodos utilizados para sintetizar los resultados y justifique sus elecciones. Si se ha realizado un metanálisis, describa los modelos, los métodos para identificar la presencia y el alcance de la heterogeneidad estadística, y los programas informáticos utilizados. |                                         |
|                                              | 13e      | Describa los métodos utilizados para explorar las posibles causas de heterogeneidad entre los resultados de los estudios (por ejemplo, análisis de subgrupos, metarregresión).                                                                                                         |                                         |
|                                              | 13f      | Describa los análisis de sensibilidad que se hayan realizado para evaluar la robustez de los resultados de la síntesis.                                                                                                                                                                |                                         |
| Evaluación del sesgo en el informe           | 14       | Describa los métodos utilizados para evaluar el riesgo de sesgo debido a resultados faltantes en una síntesis (derivados de los sesgos en el informe).                                                                                                                                 |                                         |
| Evaluación de la certeza de la evidencia     | 15       | Describa los métodos utilizados para evaluar la certeza (o confianza) en el cuerpo de la evidencia para cada desenlace.                                                                                                                                                                |                                         |
| <b>RESULTADOS</b>                            |          |                                                                                                                                                                                                                                                                                        |                                         |
| Selección de los estudios                    | 16a      | Describa los resultados de los procesos de búsqueda y selección, desde el número de registros identificados en la búsqueda hasta el número de estudios incluidos en la revisión, idealmente utilizando un diagrama de flujo (ver Figura 1).                                            |                                         |
|                                              | 16b      | Cite los estudios que aparentemente cumplían con los criterios de inclusión, pero que fueron excluidos, y explique por qué fueron excluidos.                                                                                                                                           |                                         |
| Características de los estudios              | 17       | Cite cada estudio incluido y presente sus características.                                                                                                                                                                                                                             |                                         |
| Riesgo de sesgo de los estudios individuales | 18       | Presente las evaluaciones del riesgo de sesgo para cada uno de los estudios incluidos.                                                                                                                                                                                                 |                                         |
| Resultados de los estudios individuales      | 19       | Presente, para todos los desenlaces y para cada estudio: a) los estadísticos de resumen para cada grupo (si procede) y b) la estimación del efecto y su precisión (por ejemplo, intervalo de credibilidad o de confianza), idealmente utilizando tablas estructuradas o gráficos.      |                                         |

| Sección/tema              | Ítem n.º | Ítem de la lista de verificación                                                                                                                                                                                                                                                                                                               | Localización del ítem en la publicación |
|---------------------------|----------|------------------------------------------------------------------------------------------------------------------------------------------------------------------------------------------------------------------------------------------------------------------------------------------------------------------------------------------------|-----------------------------------------|
| Resultados de la síntesis | 20a      | Para cada síntesis, resuma brevemente las características y el riesgo de sesgo entre los estudios contribuyentes.                                                                                                                                                                                                                              |                                         |
|                           | 20b      | Presente los resultados de todas las síntesis estadísticas realizadas. Si se ha realizado un metanálisis, presente para cada uno de ellos el estimador de resumen y su precisión (por ejemplo, intervalo de credibilidad o de confianza) y las medidas de heterogeneidad estadística. Si se comparan grupos, describa la dirección del efecto. |                                         |
|                           | 20c      | Presente los resultados de todas las investigaciones sobre las posibles causas de heterogeneidad entre los resultados de los estudios.                                                                                                                                                                                                         |                                         |
|                           | 20d      | Presente los resultados de todos los análisis de sensibilidad realizados para evaluar la robustez de los resultados sintetizados.                                                                                                                                                                                                              |                                         |
| Sesgos en el informe      | 21       | Presente las evaluaciones del riesgo de sesgo debido a resultados faltantes (derivados de los sesgos en el informe) para cada síntesis evaluada.                                                                                                                                                                                               |                                         |
| Certeza de la evidencia   | 22       | Presente las evaluaciones de la certeza (o confianza) en el cuerpo de la evidencia para cada desenlace evaluado.                                                                                                                                                                                                                               |                                         |
| <b>DISCUSIÓN</b>          |          |                                                                                                                                                                                                                                                                                                                                                |                                         |
| Discusión                 | 23a      | Proporcione una interpretación general de los resultados en el contexto de otras evidencias.                                                                                                                                                                                                                                                   |                                         |
|                           | 23b      | Argumente las limitaciones de la evidencia incluida en la revisión.                                                                                                                                                                                                                                                                            |                                         |
|                           | 23c      | Argumente las limitaciones de los procesos de revisión utilizados.                                                                                                                                                                                                                                                                             |                                         |
|                           | 23d      | Argumente las implicaciones de los resultados para la práctica, las políticas y las futuras investigaciones.                                                                                                                                                                                                                                   |                                         |
| <b>OTRA INFORMACIÓN</b>   |          |                                                                                                                                                                                                                                                                                                                                                |                                         |
| Registro y protocolo      | 24a      | Proporcione la información del registro de la revisión, incluyendo el nombre y el número de registro, o declare que la revisión no ha sido registrada.                                                                                                                                                                                         |                                         |
|                           | 24b      | Indique dónde se puede acceder al protocolo, o declare que no se ha redactado ningún protocolo.                                                                                                                                                                                                                                                |                                         |
|                           | 24c      | Describa y explique cualquier enmienda a la información proporcionada en el registro o en el protocolo.                                                                                                                                                                                                                                        |                                         |
| Financiación              | 25       | Describa las fuentes de apoyo financiero o no financiero para la revisión y el papel de los financiadores o patrocinadores en la revisión.                                                                                                                                                                                                     |                                         |

| Sección/tema                                        | Ítem n.º | Ítem de la lista de verificación                                                                                                                                                                                                                                                                                                      | Localización del ítem en la publicación |
|-----------------------------------------------------|----------|---------------------------------------------------------------------------------------------------------------------------------------------------------------------------------------------------------------------------------------------------------------------------------------------------------------------------------------|-----------------------------------------|
| Conflicto de intereses                              | 26       | Declare los conflictos de intereses de los autores de la revisión.                                                                                                                                                                                                                                                                    |                                         |
| Disponibilidad de datos, códigos y otros materiales | 27       | Especifique qué elementos de los que se indican a continuación están disponibles al público y dónde se pueden encontrar: plantillas de formularios de extracción de datos, datos extraídos de los estudios incluidos, datos utilizados para todos los análisis, código de análisis, cualquier otro material utilizado en la revisión. |                                         |

## Tabla 2 del material adicional

## Lista de verificación PRISMA 2020 ampliada

Nota: esta lista de verificación ampliada establece los elementos recomendados para la publicación de cada uno de los ítems de la declaración PRISMA 2020. Los elementos que **no** están en cursiva se consideran «esenciales» y deberían incluirse en el informe principal o como material suplementario para todas las revisiones sistemáticas (excepto las precedidas por «Si...», que solo deberían notificarse cuando corresponda). Los elementos escritos en cursiva son «adicionales» y, aunque no son esenciales, proporcionan información complementaria que puede mejorar la integridad y la usabilidad de las publicaciones de revisiones sistemáticas. Nótese que los elementos que se presentan aquí son una versión abreviada de los que se presentan en el artículo de explicación y elaboración (37), y se han eliminado referencias y algunos ejemplos. Se recomienda consultar el artículo de explicación y elaboración si se requiere más claridad o información.

| Sección             | N.º | Elementos recomendados para la presentación de publicaciones                                                                                                                                                                                                                                                                                                                                                                                                                                                                                                                                                                                                                                         |
|---------------------|-----|------------------------------------------------------------------------------------------------------------------------------------------------------------------------------------------------------------------------------------------------------------------------------------------------------------------------------------------------------------------------------------------------------------------------------------------------------------------------------------------------------------------------------------------------------------------------------------------------------------------------------------------------------------------------------------------------------|
| <b>TÍTULO</b>       |     |                                                                                                                                                                                                                                                                                                                                                                                                                                                                                                                                                                                                                                                                                                      |
| TÍTULO              | 1   | <ul style="list-style-type: none"> <li>Identifique la publicación como una revisión sistemática en el título.</li> <li>Formule un título descriptivo que proporcione información clave sobre el objetivo o la pregunta principal o la pregunta que la revisión abordará (por ejemplo, las poblaciones y las intervenciones que abordará la revisión).</li> <li><i>Considere la posibilidad de proporcionar información adicional en el título, como el método de análisis usado, los diseños de los estudios incluidos, o una indicación de que la revisión es una actualización de una revisión existente o se trata de una revisión sistemática continuamente actualizada («viva»).</i></li> </ul> |
| <b>RESUMEN</b>      |     |                                                                                                                                                                                                                                                                                                                                                                                                                                                                                                                                                                                                                                                                                                      |
| RESUMEN             | 2   | <ul style="list-style-type: none"> <li>Presente un resumen estructurado que aborde cada uno de los ítems de la lista de verificación PRISMA 2020 para resúmenes (tabla 2).</li> </ul>                                                                                                                                                                                                                                                                                                                                                                                                                                                                                                                |
| <b>INTRODUCCIÓN</b> |     |                                                                                                                                                                                                                                                                                                                                                                                                                                                                                                                                                                                                                                                                                                      |
| JUSTIFICACIÓN       | 3   | <ul style="list-style-type: none"> <li>Describa el estado actual del conocimiento y sus incertidumbres.</li> <li>Explique por qué es importante realizar la revisión.</li> <li>Si se dispone de otras revisiones sistemáticas que abordan la misma pregunta (o una de muy similar), explique por qué se ha considerado necesaria la revisión actual. Si la revisión es una actualización o una réplica de una revisión sistemática en particular, indíquelo y cite la revisión previa.</li> </ul>                                                                                                                                                                                                    |

| Sección                   | N.º | Elementos recomendados para la presentación de publicaciones                                                                                                                                                                                                                                                                                                                                                                                                                                                                                                                                                                                                                                                                                                                                                                                                                                                                                                                                                                                                                                                                                                                                                                                                                                |
|---------------------------|-----|---------------------------------------------------------------------------------------------------------------------------------------------------------------------------------------------------------------------------------------------------------------------------------------------------------------------------------------------------------------------------------------------------------------------------------------------------------------------------------------------------------------------------------------------------------------------------------------------------------------------------------------------------------------------------------------------------------------------------------------------------------------------------------------------------------------------------------------------------------------------------------------------------------------------------------------------------------------------------------------------------------------------------------------------------------------------------------------------------------------------------------------------------------------------------------------------------------------------------------------------------------------------------------------------|
|                           |     | <ul style="list-style-type: none"> <li>• Si la revisión examina los efectos de intervenciones, describa brevemente cómo podrían funcionar las intervenciones examinadas.</li> <li>• <i>Si existe complejidad en la intervención o en el contexto de su ejecución (o en ambos) (por ejemplo, intervenciones de múltiples componentes, consideraciones de equidad), considere presentar un modelo lógico para mostrar visualmente la relación hipotética entre los componentes de la intervención y los desenlaces.</i></li> </ul>                                                                                                                                                                                                                                                                                                                                                                                                                                                                                                                                                                                                                                                                                                                                                            |
| OBJETIVOS                 | 4   | <ul style="list-style-type: none"> <li>• Proporcione una declaración explícita de todos los objetivos o preguntas que se abordan en la revisión, expresados en términos de un marco pertinente de formulación de preguntas.</li> <li>• Si el objetivo es evaluar los efectos de intervenciones, utilice el marco población, intervención, comparador y desenlace (<i>population, intervention, comparator, outcome</i> - PICO) o una de sus variantes, para indicar las comparaciones que se llevarán a cabo.</li> </ul>                                                                                                                                                                                                                                                                                                                                                                                                                                                                                                                                                                                                                                                                                                                                                                    |
| <b>MÉTODOS</b>            |     |                                                                                                                                                                                                                                                                                                                                                                                                                                                                                                                                                                                                                                                                                                                                                                                                                                                                                                                                                                                                                                                                                                                                                                                                                                                                                             |
| CRITERIOS DE ELEGIBILIDAD | 5   | <ul style="list-style-type: none"> <li>• Especifique todas las características del estudio utilizadas para decidir si un estudio era elegible para su inclusión en la revisión, es decir, los componentes descritos en el marco PICO o una de sus variantes, y otras características, como los diseños y escenarios, y la duración mínima del periodo de seguimiento.</li> <li>• Especifique los criterios de elegibilidad respecto a las características de la publicación, como el año de difusión o publicación, idioma y el estado de la publicación (por ejemplo, si informes, como manuscritos no publicados y resúmenes de congresos, fueron elegibles para su inclusión).</li> <li>• Indique claramente si los estudios no fueron elegibles porque no se midieron los desenlaces de interés, o si no fueron elegibles porque no se notificaron los resultados de los desenlaces de interés.</li> <li>• Especifique los grupos utilizados en la síntesis (por ejemplo, grupos según la intervención, los desenlaces y la población) y enlázelos con las comparaciones especificadas en los objetivos (ítem n.º 4).</li> <li>• <i>Considere la posibilidad de proporcionar una justificación para cualquier restricción importante en la elegibilidad de los estudios.</i></li> </ul> |
| FUENTES DE INFORMACIÓN    | 6   | <ul style="list-style-type: none"> <li>• Especifique la fecha en la que cada fuente (por ejemplo, base de datos, registro, sitio web, organización) se buscó o consultó por última vez.</li> <li>• Si se ha buscado en bases de datos bibliográficas, especifique para cada base de datos su nombre (por ejemplo, MEDLINE, CINAHL), la interfaz o plataforma a través de la cual se buscó en la base de datos (por ejemplo, Ovid, EBSCOhost) y las fechas de cobertura (cuando se proporciona esta información).</li> </ul>                                                                                                                                                                                                                                                                                                                                                                                                                                                                                                                                                                                                                                                                                                                                                                 |

| Sección                | N.º | Elementos recomendados para la presentación de publicaciones                                                                                                                                                                                                                                                                                                                                                                                                                                                                                                                                                                                                                                                                                                                                                                                                                                                                                                                                                                                                                                                                                                                                                                                                                                                                                                                                                                                                                                                                                                                                                                                                                                                         |
|------------------------|-----|----------------------------------------------------------------------------------------------------------------------------------------------------------------------------------------------------------------------------------------------------------------------------------------------------------------------------------------------------------------------------------------------------------------------------------------------------------------------------------------------------------------------------------------------------------------------------------------------------------------------------------------------------------------------------------------------------------------------------------------------------------------------------------------------------------------------------------------------------------------------------------------------------------------------------------------------------------------------------------------------------------------------------------------------------------------------------------------------------------------------------------------------------------------------------------------------------------------------------------------------------------------------------------------------------------------------------------------------------------------------------------------------------------------------------------------------------------------------------------------------------------------------------------------------------------------------------------------------------------------------------------------------------------------------------------------------------------------------|
|                        |     | <ul style="list-style-type: none"> <li>• Si se han buscado registros de estudios, bases de datos de agencias reguladoras u otros repositorios en línea, especifique el nombre de cada recurso y las restricciones de fecha que fueron aplicadas.</li> <li>• Si se ha explorado o buscado en sitios web, motores de búsqueda u otras fuentes en línea, especifique el nombre y la URL de cada fuente.</li> <li>• Si se ha contactado con organizaciones o empresas para identificar estudios, especifique el nombre de cada fuente.</li> <li>• Si se ha contactado con personas para identificar estudios, especifique los tipos de personas contactadas (por ejemplo, los autores de los estudios incluidos en la revisión o investigadores con experiencia en el área).</li> <li>• Si se han examinado listas de referencias, especifique los tipos de referencias examinadas (por ejemplo, referencias citadas en publicaciones de estudios incluidos en la revisión sistemática o referencias citadas en publicaciones de revisiones sistemáticas sobre el mismo tema o un tema similar).</li> <li>• Si se han realizado búsquedas de citas o referencias de citas (también llamadas búsqueda de citas anteriores y posteriores), especifique los detalles bibliográficos de las publicaciones a las que se aplicó la búsqueda de citas, el índice de citación o la plataforma utilizada (por ejemplo, Web of Science) y la fecha en la que se realizó la búsqueda de citas.</li> <li>• Si se han consultado revistas o actas de congresos, especifique los nombres de cada fuente, las fechas que se han tenido en cuenta y la forma en la que se buscaron (por ejemplo, búsqueda manual o en línea).</li> </ul> |
| ESTRATEGIA DE BÚSQUEDA | 7   | <ul style="list-style-type: none"> <li>• Proporcione la estrategia de búsqueda completa, línea a línea, tal como se ejecuta en una base de datos con una interfaz sofisticada (como Ovid) o la secuencia de términos que se utilizaron para buscar de manera más simple en interfaces como los motores de búsqueda o los sitios web.</li> <li>• Describa los límites aplicados a la estrategia de búsqueda (por ejemplo, la fecha o el idioma) y justifíquelos vinculándolos a los criterios de elegibilidad de la revisión.</li> <li>• Cite si se utilizaron otros enfoques de búsqueda, incluidos los filtros de búsqueda diseñados para recuperar tipos específicos de registros o las estrategias de búsqueda de otras revisiones sistemáticas. Si se han adaptado otros enfoques, por ejemplo, o si se han modificado los filtros de búsqueda, cite los cambios realizados.</li> <li>• Si se han utilizado herramientas de procesamiento de lenguaje natural o de análisis de frecuencias de texto para identificar o refinar las palabras clave, sinónimos o términos de indexación temática para su uso en la estrategia de búsqueda, especifique las herramientas utilizadas.</li> </ul>                                                                                                                                                                                                                                                                                                                                                                                                                                                                                                                     |

| Sección              | N.º | Elementos recomendados para la presentación de publicaciones                                                                                                                                                                                                                                                                                                                                                                                                                                                                                                                                                                                                                                                                                                                                                                                                                                                                                                                                                                                                                                                                                                                                                                                                                                                                                                                                                                                                                                                                                                                                                                                                                                                                                                                                                                                                                                                                                                                                                |
|----------------------|-----|-------------------------------------------------------------------------------------------------------------------------------------------------------------------------------------------------------------------------------------------------------------------------------------------------------------------------------------------------------------------------------------------------------------------------------------------------------------------------------------------------------------------------------------------------------------------------------------------------------------------------------------------------------------------------------------------------------------------------------------------------------------------------------------------------------------------------------------------------------------------------------------------------------------------------------------------------------------------------------------------------------------------------------------------------------------------------------------------------------------------------------------------------------------------------------------------------------------------------------------------------------------------------------------------------------------------------------------------------------------------------------------------------------------------------------------------------------------------------------------------------------------------------------------------------------------------------------------------------------------------------------------------------------------------------------------------------------------------------------------------------------------------------------------------------------------------------------------------------------------------------------------------------------------------------------------------------------------------------------------------------------------|
|                      |     | <ul style="list-style-type: none"> <li>• Si se ha utilizado una herramienta para traducir automáticamente las secuencias de búsqueda de una base de datos a otra, especifique la herramienta utilizada.</li> <li>• Si la estrategia de búsqueda ha sido validada, por ejemplo, evaluando si podía identificar un conjunto de estudios claramente elegibles, indique el proceso de validación utilizado y especifique qué estudios se incluyeron en el conjunto de validación.</li> <li>• Si la estrategia de búsqueda ha sido revisada por pares, indique el proceso de revisión por pares utilizado y especifique cualquier herramienta utilizada, como la «Peer Review of Electronic Search Strategies (PRESS)».</li> <li>• Si la estructura de la estrategia de búsqueda adoptada no está basada en un estilo tipo «PICO», describa la estructura conceptual final y las exploraciones que se realizaron para obtenerla.</li> </ul>                                                                                                                                                                                                                                                                                                                                                                                                                                                                                                                                                                                                                                                                                                                                                                                                                                                                                                                                                                                                                                                                      |
| PROCESO DE SELECCIÓN | 8   | <p><i>Recomendaciones para la presentación de la publicación independientemente de los procesos de selección utilizados:</i></p> <ul style="list-style-type: none"> <li>• Indique cuántos revisores cribaron cada registro (título/resumen) y cada informe o publicación recuperada (texto completo), si varios revisores trabajaron de forma independiente en cada etapa del cribado o no, y cualquier proceso utilizado para resolver los desacuerdos entre los revisores.</li> <li>• Indique los procesos utilizados para obtener o confirmar la información pertinente a partir de los autores de los estudios.</li> <li>• Si los resúmenes estructurados o artículos requirieron ser traducidos a otro idioma para determinar su elegibilidad, indique cómo se tradujeron dichos artículos.</li> </ul> <p><i>Recomendaciones para la presentación de la publicación de revisiones sistemáticas en las que se han utilizado herramientas de automatización en el proceso de selección:</i></p> <ul style="list-style-type: none"> <li>• Indique cómo se integraron las herramientas de automatización en el proceso general de selección de los estudios.</li> <li>• Si se ha aplicado un clasificador externo derivado de una máquina de aprendizaje (<i>machine learning</i>) (por ejemplo, el clasificador de ensayos clínicos aleatorizados de Cochrane), ya sea para eliminar registros o para reemplazar a un único revisor, incluya una referencia o la URL de la versión utilizada. Si el clasificador se ha utilizado para eliminar registros <i>antes del cribado</i>, indique el número de registros eliminados en el diagrama de flujo de PRISMA como «Registros marcados como no elegibles por las herramientas de automatización».</li> <li>• Si se ha utilizado un clasificador interno derivado de una máquina de aprendizaje para ayudar en el proceso de cribado, identifique los programas informáticos/clasificador y la versión, describa cómo se utilizó (por ejemplo,</li> </ul> |

| Sección                            | N.º | Elementos recomendados para la presentación de publicaciones                                                                                                                                                                                                                                                                                                                                                                                                                                                                                                                                                                                                                                                                                                                                                                                                                                                                                                                                                                                                                                                                                                                                                                                                                                                                                                                         |
|------------------------------------|-----|--------------------------------------------------------------------------------------------------------------------------------------------------------------------------------------------------------------------------------------------------------------------------------------------------------------------------------------------------------------------------------------------------------------------------------------------------------------------------------------------------------------------------------------------------------------------------------------------------------------------------------------------------------------------------------------------------------------------------------------------------------------------------------------------------------------------------------------------------------------------------------------------------------------------------------------------------------------------------------------------------------------------------------------------------------------------------------------------------------------------------------------------------------------------------------------------------------------------------------------------------------------------------------------------------------------------------------------------------------------------------------------|
|                                    |     | <p>para eliminar registros o sustituir a un único revisor) y se entrenó (si es relevante), y qué validación interna o externa se hizo para comprender el riesgo de perder estudios o de una clasificación incorrecta.</p> <ul style="list-style-type: none"> <li>Si se han utilizado algoritmos de una máquina de aprendizaje (<i>machine learning</i>) para dar prioridad al cribado (mediante los cuales los registros no cribados se reordenan continuamente sobre la base de las decisiones de cribado), indique los programas informáticos utilizados y proporcione detalles de las reglas de cribado aplicadas.</li> </ul> <p><i>Recomendaciones para la presentación de la publicación de revisiones sistemáticas en las que se ha utilizado externalización de tareas (crowdsourcing) o evaluaciones previas «conocidas» en el proceso de selección:</i></p> <ul style="list-style-type: none"> <li>Si se ha utilizado la <i>externalización de tareas</i> para cribar los registros, proporcione detalles de la plataforma utilizada y especifique cómo se integró en el proceso general de la selección de estudios.</li> <li>Si se han utilizado conjuntos de datos de registros ya cribados para eliminar los registros recuperados por la búsqueda para una consideración posterior, describa brevemente el proceso de obtención de esos conjuntos de datos.</li> </ul> |
| PROCESO DE EXTRACCIÓN DE LOS DATOS | 9   | <ul style="list-style-type: none"> <li>Indique el número de revisores que recogieron datos de cada publicación, si varios revisores trabajaron de manera independiente o no, e identifique los procesos utilizados para resolver los desacuerdos entre los encargados de extraer los datos.</li> <li>Indique los procesos utilizados para obtener o confirmar los datos relevantes por parte de los investigadores del estudio.</li> <li>Si se ha utilizado alguna herramienta de automatización para recopilar datos, describa cómo se utilizó la herramienta y cómo se habilitó, e indique qué validación interna o externa fue utilizada para comprender el riesgo de errores en la extracción.</li> <li>Si los artículos requirieron la traducción a otro idioma para permitir la extracción de datos, indique cómo se tradujeron dichos artículos.</li> <li>Si se ha utilizado algún programa informático para extraer datos a partir de las figuras, especifique el programa informático utilizado.</li> <li>Si se han utilizado reglas de decisión para seleccionar los datos a partir de múltiples informes correspondientes a un mismo estudio y se han adoptado medidas para resolver las inconsistencias entre los informes, especifique las reglas y las medidas utilizadas.</li> </ul>                                                                                  |
| LISTA DE LOS DATOS (desenlaces)    | 10a | <ul style="list-style-type: none"> <li>Enumere y defina los dominios de los desenlaces y los marcos temporales de medición para los cuales se buscaron los datos.</li> </ul>                                                                                                                                                                                                                                                                                                                                                                                                                                                                                                                                                                                                                                                                                                                                                                                                                                                                                                                                                                                                                                                                                                                                                                                                         |

| Sección                                                                         | N.º | Elementos recomendados para la presentación de publicaciones                                                                                                                                                                                                                                                                                                                                                                                                                                                                                                                                                                                                                                                                                                                                                                                                                                                                                                                                                                                                                                                                                                                                             |
|---------------------------------------------------------------------------------|-----|----------------------------------------------------------------------------------------------------------------------------------------------------------------------------------------------------------------------------------------------------------------------------------------------------------------------------------------------------------------------------------------------------------------------------------------------------------------------------------------------------------------------------------------------------------------------------------------------------------------------------------------------------------------------------------------------------------------------------------------------------------------------------------------------------------------------------------------------------------------------------------------------------------------------------------------------------------------------------------------------------------------------------------------------------------------------------------------------------------------------------------------------------------------------------------------------------------|
|                                                                                 |     | <ul style="list-style-type: none"> <li>• Especifique si se buscaron todos los resultados compatibles con cada dominio de los desenlaces en cada estudio y, de no ser así, qué proceso se utilizó para seleccionar los resultados dentro de los dominios elegibles.</li> <li>• Si se han introducido cambios en la inclusión o definición de los dominios de los desenlaces, o en la clasificación de importancia que se les dio en la revisión, especifique y justifique los cambios.</li> <li>• Si se han introducido cambios en los procesos utilizados para seleccionar los resultados dentro de los dominios de los desenlaces elegibles, especifique y justifique los cambios.</li> <li>• <i>Considere especificar qué dominios de los desenlaces se consideraron más importantes para la interpretación de las conclusiones de la revisión y justifique su clasificación (por ejemplo «un reciente conjunto de desenlaces básicos identificó los desenlaces calificados como ‘críticos’ como los más importantes para los pacientes»)</i></li> </ul>                                                                                                                                               |
| LISTA DE LOS DATOS<br>(otras variables)                                         | 10b | <ul style="list-style-type: none"> <li>• Enumere y defina todas las demás variables para las cuales se buscaron datos (por ejemplo, características de los participantes y de la intervención, fuentes de financiación).</li> <li>• Describa las asunciones hechas sobre cualquier información faltante o incierta de los estudios.</li> <li>• Si se ha utilizado una herramienta para informar sobre los datos que deben recogerse, cite la herramienta utilizada.</li> </ul>                                                                                                                                                                                                                                                                                                                                                                                                                                                                                                                                                                                                                                                                                                                           |
| ESTUDIO DE EVALUACIÓN<br>DEL RIESGO DE SESGO EN<br>LOS ESTUDIOS<br>INDIVIDUALES | 11  | <ul style="list-style-type: none"> <li>• Especifique las herramientas (y la versión) utilizadas para evaluar el riesgo de sesgo en los estudios incluidos.</li> <li>• Especifique los dominios/componentes/ítems metodológicos de las herramientas de riesgo de sesgo utilizadas.</li> <li>• Indique si se ha realizado un juicio global del riesgo de sesgo que resuma todos los dominios/componentes/ítems y, en caso afirmativo, qué reglas se han utilizado para llegar a una determinación global.</li> <li>• Especifique si se han hecho adaptaciones de alguna herramienta existente para evaluar el riesgo de sesgo en los estudios.</li> <li>• Si se ha desarrollado una nueva herramienta de riesgo de sesgo para su uso en la revisión, describa su contenido y póngala a disposición del público.</li> <li>• Indique cuántos revisores evaluaron el riesgo de sesgo en cada estudio, si varios revisores trabajaron de manera independiente, e identifique los procesos utilizados para resolver los desacuerdos entre los evaluadores.</li> <li>• Especifique los procesos utilizados para obtener o confirmar la información relevante a partir de los autores de los estudios.</li> </ul> |

| Sección                                                  | N.º | Elementos recomendados para la presentación de publicaciones                                                                                                                                                                                                                                                                                                                                                                                                                                                                                                                                                                                                                                                                                                                                                                                                                                                                                                           |
|----------------------------------------------------------|-----|------------------------------------------------------------------------------------------------------------------------------------------------------------------------------------------------------------------------------------------------------------------------------------------------------------------------------------------------------------------------------------------------------------------------------------------------------------------------------------------------------------------------------------------------------------------------------------------------------------------------------------------------------------------------------------------------------------------------------------------------------------------------------------------------------------------------------------------------------------------------------------------------------------------------------------------------------------------------|
|                                                          |     | <ul style="list-style-type: none"> <li>Si se ha utilizado una herramienta de automatización para evaluar el riesgo de sesgo, describa cómo se utilizó la herramienta de automatización y cómo se habilitó, e indique los detalles acerca del rendimiento y la validación interna de la herramienta.</li> </ul>                                                                                                                                                                                                                                                                                                                                                                                                                                                                                                                                                                                                                                                         |
| MEDIDAS DEL EFECTO                                       | 12  | <ul style="list-style-type: none"> <li>Especifique para cada desenlace (o tipo de desenlace [por ejemplo, binario, continuo]), las medidas del efecto (por ejemplo, razón de riesgos, diferencia de medias) utilizadas en la síntesis o presentación de los resultados.</li> <li>Indique los umbrales (o rangos) utilizados para interpretar la magnitud del efecto (por ejemplo, diferencia mínimamente importante; rangos para efectos triviales o no triviales, pequeños, moderados y grandes) y la justificación de esos umbrales.</li> <li>Si los resultados sintetizados se volvieron a expresar con una medida del efecto diferente, describa el método utilizado para volver a expresar los resultados (por ejemplo, un metanálisis que usó razones de riesgos (RR) y se calculó la reducción absoluta del riesgo basada en el riesgo asumido del comparador).</li> <li>Considere la posibilidad de justificar la elección de la medida del efecto.</li> </ul> |
| MÉTODOS DE SÍNTESIS<br>(elegibilidad para la síntesis)   | 13a | <ul style="list-style-type: none"> <li>Describa los procesos utilizados para decidir los estudios que fueron elegibles para cada síntesis.</li> </ul>                                                                                                                                                                                                                                                                                                                                                                                                                                                                                                                                                                                                                                                                                                                                                                                                                  |
| MÉTODOS DE SÍNTESIS<br>(preparación para la síntesis)    | 13b | <ul style="list-style-type: none"> <li>Especifique los métodos necesarios para preparar los datos recopilados de los estudios para su presentación o síntesis, como el manejo de los datos faltantes en los estadísticos de resumen o las conversiones de datos.</li> </ul>                                                                                                                                                                                                                                                                                                                                                                                                                                                                                                                                                                                                                                                                                            |
| MÉTODOS DE SÍNTESIS<br>(tabulación y métodos gráficos)   | 13c | <ul style="list-style-type: none"> <li>Especifique las estructuras tabulares elegidas utilizadas para presentar los resultados de los estudios individuales y su síntesis, junto con los detalles de los datos presentados.</li> <li>Describa los métodos gráficos elegidos utilizados para mostrar visualmente los resultados de los estudios y las síntesis individuales.</li> <li>Si los estudios están ordenados o agrupados en las tablas o gráficos basados en las características del estudio (por ejemplo, por el tamaño del efecto del estudio, año de publicación), considere indicar la base del ordenamiento/agrupamiento elegido.</li> <li>Si se utilizaron gráficos no estándar, considere indicar la justificación para seleccionar el gráfico elegido.</li> </ul>                                                                                                                                                                                      |
| MÉTODOS DE SÍNTESIS<br>(métodos de síntesis estadística) | 13d | <ul style="list-style-type: none"> <li>Si se han utilizado métodos de síntesis estadística, haga referencia a los programas informáticos, los paquetes y las versiones utilizadas para aplicar los métodos de síntesis.</li> </ul>                                                                                                                                                                                                                                                                                                                                                                                                                                                                                                                                                                                                                                                                                                                                     |

| Sección                                                          | N.º | Elementos recomendados para la presentación de publicaciones                                                                                                                                                                                                                                                                                                                                                                                                                                                                                                                                                                                                                                                                                                                                                                                                                                                                                                                                                                                                                                                                                                                                                                                                                                                                                                                                                                                                                                                                                                                                                                                                                                                                                                                                                                                                                                                                                                                                                                                                                                                                                                                                                                                                                                                                              |
|------------------------------------------------------------------|-----|-------------------------------------------------------------------------------------------------------------------------------------------------------------------------------------------------------------------------------------------------------------------------------------------------------------------------------------------------------------------------------------------------------------------------------------------------------------------------------------------------------------------------------------------------------------------------------------------------------------------------------------------------------------------------------------------------------------------------------------------------------------------------------------------------------------------------------------------------------------------------------------------------------------------------------------------------------------------------------------------------------------------------------------------------------------------------------------------------------------------------------------------------------------------------------------------------------------------------------------------------------------------------------------------------------------------------------------------------------------------------------------------------------------------------------------------------------------------------------------------------------------------------------------------------------------------------------------------------------------------------------------------------------------------------------------------------------------------------------------------------------------------------------------------------------------------------------------------------------------------------------------------------------------------------------------------------------------------------------------------------------------------------------------------------------------------------------------------------------------------------------------------------------------------------------------------------------------------------------------------------------------------------------------------------------------------------------------------|
|                                                                  |     | <ul style="list-style-type: none"> <li>• Si no ha sido posible realizar un metanálisis, describa y justifique los métodos de síntesis o el enfoque de resumen utilizados.</li> <li>• Si se ha realizado un metanálisis, especifique: <ul style="list-style-type: none"> <li>○ el modelo del metanálisis (efecto fijo, efectos fijos o efectos aleatorios) y justifique la selección del modelo,</li> <li>○ el método utilizado (por ejemplo, Mantel-Haenszel, varianza inversa), y</li> <li>○ los métodos utilizados para identificar o cuantificar la heterogeneidad estadística (por ejemplo, inspección visual de los resultados, una prueba estadística formal de heterogeneidad, varianza de la heterogeneidad (<math>\tau^2</math>), inconsistencia (por ejemplo, <math>I^2</math>), e intervalos de predicción).</li> </ul> </li> <li>• Si se ha utilizado un modelo de efectos aleatorios en el metanálisis: <ul style="list-style-type: none"> <li>○ especifique el estimador de la varianza entre los estudios (heterogeneidad) utilizado (por ejemplo, DerSimonian y Laird, máxima verosimilitud restringida (<i>Restricted maximum likelihood</i> – REML),</li> <li>○ especifique el método utilizado para calcular el intervalo de confianza de las medidas del efecto (por ejemplo, intervalo de confianza de tipo Wald, Hartung-Knapp-Sidik-Jonkman), y</li> <li>○ <i>considere especificar otros detalles sobre los métodos utilizados, como el método para calcular los límites de confianza de la varianza de la heterogeneidad.</i></li> </ul> </li> <li>• Si se ha utilizado un enfoque bayesiano para el metanálisis, describa las distribuciones previas sobre las cantidades de interés (por ejemplo, el efecto de una intervención que se está analizando, la cantidad de heterogeneidad en los resultados a través de los estudios).</li> <li>• Si las estimaciones de efectos múltiples de un estudio se han incluido en un metanálisis, describa los modelos o los métodos utilizados para modelar o contabilizar la dependencia estadística (por ejemplo, el metanálisis multivariado, los modelos de niveles múltiples o la estimación robusta de la varianza).</li> <li>• Si se considera que no es posible o apropiado realizar una síntesis planificada, comunique y justifique esta decisión.</li> </ul> |
| MÉTODOS DE SÍNTESIS<br>(métodos para explorar la heterogeneidad) | 13e | <ul style="list-style-type: none"> <li>• Si se han utilizado métodos para explorar las posibles causas de heterogeneidad estadística, especifique el método utilizado (por ejemplo, análisis de subgrupos, metarregresión).</li> <li>• Si se ha realizado un análisis de subgrupos o una metarregresión, especifique para cada uno: <ul style="list-style-type: none"> <li>○ qué factores se han explorado, los niveles de esos factores y qué modificación en la dirección del efecto era la esperada y por qué (cuando sea posible),</li> </ul> </li> </ul>                                                                                                                                                                                                                                                                                                                                                                                                                                                                                                                                                                                                                                                                                                                                                                                                                                                                                                                                                                                                                                                                                                                                                                                                                                                                                                                                                                                                                                                                                                                                                                                                                                                                                                                                                                             |

| Sección                                           | N.º | Elementos recomendados para la presentación de publicaciones                                                                                                                                                                                                                                                                                                                                                                                                                                                                                                                                                                                                                                                                                                                                                                                                                                                                                                                                                                                                                                                                                                                                                                                                                                                                                                                                                                                                                                                                                                                                                                                   |
|---------------------------------------------------|-----|------------------------------------------------------------------------------------------------------------------------------------------------------------------------------------------------------------------------------------------------------------------------------------------------------------------------------------------------------------------------------------------------------------------------------------------------------------------------------------------------------------------------------------------------------------------------------------------------------------------------------------------------------------------------------------------------------------------------------------------------------------------------------------------------------------------------------------------------------------------------------------------------------------------------------------------------------------------------------------------------------------------------------------------------------------------------------------------------------------------------------------------------------------------------------------------------------------------------------------------------------------------------------------------------------------------------------------------------------------------------------------------------------------------------------------------------------------------------------------------------------------------------------------------------------------------------------------------------------------------------------------------------|
|                                                   |     | <ul style="list-style-type: none"> <li>○ si los análisis se han realizado utilizando variables a nivel de estudio (es decir, cuando cada estudio es incluido en un subgrupo solamente), contrastes dentro del estudio (es decir, cuando los datos sobre subconjuntos de participantes dentro de un estudio están disponibles, lo que permite incluir el estudio en más de un subgrupo) o alguna combinación de las anteriores, y</li> <li>○ cómo se han comparado los efectos de los subgrupos (por ejemplo, prueba estadística para la interacción para los análisis de subgrupos).</li> </ul>                                                                                                                                                                                                                                                                                                                                                                                                                                                                                                                                                                                                                                                                                                                                                                                                                                                                                                                                                                                                                                                |
|                                                   |     | <ul style="list-style-type: none"> <li>• Si se han utilizado otros métodos para explorar la heterogeneidad porque los datos no eran susceptibles para un metanálisis de estimaciones de efectos (por ejemplo, tablas estructuradas para examinar la variación de los resultados a través de los estudios basados en subpoblaciones), describa los métodos utilizados, junto con los factores y niveles.</li> <li>• Identifique si los análisis utilizados para explorar la heterogeneidad no fueron especificados previamente.</li> </ul>                                                                                                                                                                                                                                                                                                                                                                                                                                                                                                                                                                                                                                                                                                                                                                                                                                                                                                                                                                                                                                                                                                      |
| MÉTODOS DE SÍNTESIS<br>(análisis de sensibilidad) | 13f | <ul style="list-style-type: none"> <li>• Si se han realizado análisis de sensibilidad, proporcione los detalles de cada análisis (por ejemplo, eliminación de los estudios de alto riesgo de sesgo, utilización de un modelo alternativo de metanálisis).</li> <li>• Identifique si los análisis de sensibilidad no fueron especificados previamente.</li> </ul>                                                                                                                                                                                                                                                                                                                                                                                                                                                                                                                                                                                                                                                                                                                                                                                                                                                                                                                                                                                                                                                                                                                                                                                                                                                                               |
| EVALUACIÓN DEL SESGO<br>EN EL INFORME             | 14  | <ul style="list-style-type: none"> <li>• Especifique los métodos (herramientas, gráficos, estadísticos u otros) utilizados para determinar el riesgo de sesgo debido a resultados faltantes en una síntesis (derivados de los sesgos en el informe).</li> <li>• Si el riesgo de sesgo debido a resultados faltantes se ha evaluado utilizando una herramienta existente, especifique los componentes/dominios/ítems metodológicos de la herramienta, y el proceso utilizado para llegar a una determinación sobre el riesgo global de sesgo.</li> <li>• Si se han realizado adaptaciones de una herramienta existente para evaluar el riesgo de sesgo debido a resultados faltantes, especifique las adaptaciones.</li> <li>• Si se ha desarrollado una nueva herramienta para evaluar el riesgo de sesgo debido a resultados faltantes para su uso en la revisión, describa el contenido de la herramienta y hágalo accesible al público.</li> <li>• Indique cuántos revisores han evaluado el riesgo de sesgo debido a resultados faltantes en una síntesis, si varios revisores han trabajado de manera independiente, e identifique los procesos utilizados para resolver los desacuerdos entre los evaluadores.</li> <li>• Especifique los procesos utilizados para obtener o confirmar datos por parte de los investigadores del estudio.</li> <li>• Si se ha utilizado una herramienta de automatización para evaluar el riesgo de sesgo debido a resultados faltantes, describa cómo se utilizó la herramienta y cómo se habilitó, e indique los detalles acerca del rendimiento y la validación interna de la herramienta.</li> </ul> |

| Sección                                   | N.º | Elementos recomendados para la presentación de publicaciones                                                                                                                                                                                                                                                                                                                                                                                                                                                                                                                                                                                                                                                                                                                                                                                                                                                                                                                                                                                                                                                                                                                                                                                                                                                                                                                                                                                                                                                                                                                                                                                                                                                                                                                                                                                                                                                                                                                                                                                                                                                                                                                                                                                                                                        |
|-------------------------------------------|-----|-----------------------------------------------------------------------------------------------------------------------------------------------------------------------------------------------------------------------------------------------------------------------------------------------------------------------------------------------------------------------------------------------------------------------------------------------------------------------------------------------------------------------------------------------------------------------------------------------------------------------------------------------------------------------------------------------------------------------------------------------------------------------------------------------------------------------------------------------------------------------------------------------------------------------------------------------------------------------------------------------------------------------------------------------------------------------------------------------------------------------------------------------------------------------------------------------------------------------------------------------------------------------------------------------------------------------------------------------------------------------------------------------------------------------------------------------------------------------------------------------------------------------------------------------------------------------------------------------------------------------------------------------------------------------------------------------------------------------------------------------------------------------------------------------------------------------------------------------------------------------------------------------------------------------------------------------------------------------------------------------------------------------------------------------------------------------------------------------------------------------------------------------------------------------------------------------------------------------------------------------------------------------------------------------------|
|                                           |     | Especifique todos los sesgos en el informe e indique cómo se determinaron (por ejemplo, sesgo de publicación, sesgo de desfase temporal, sesgo de notificación de resultados, etc.).                                                                                                                                                                                                                                                                                                                                                                                                                                                                                                                                                                                                                                                                                                                                                                                                                                                                                                                                                                                                                                                                                                                                                                                                                                                                                                                                                                                                                                                                                                                                                                                                                                                                                                                                                                                                                                                                                                                                                                                                                                                                                                                |
| EVALUACIÓN DE LA CERTEZA DE LA EVIDENCIA  | 15  | <ul style="list-style-type: none"> <li>Especifique la herramienta o el sistema (y la versión) utilizado para evaluar la certeza (o la confianza) en el cuerpo de la evidencia.</li> <li>Especifique los dominios o factores considerados (por ejemplo, la precisión de la estimación del efecto, la consistencia de los hallazgos a través de los estudios) y los criterios utilizados para evaluar cada dominio o factor al valorar la certeza en el cuerpo de la evidencia.</li> <li>Describa las reglas de decisión utilizadas para llegar a una determinación global del nivel de certeza, junto con la interpretación (o definición) prevista de cada nivel de certeza.</li> <li>Si procede, indique las consideraciones específicas de la revisión para evaluar la certeza, como los umbrales utilizados para evaluar la imprecisión y los rangos de la magnitud del efecto que se pueden considerar triviales, moderados o grandes, y la justificación de esos umbrales y rangos (ítem n.º 12).</li> <li>Si se han hecho adaptaciones de una herramienta o sistema existente para evaluar la certeza, especifique las adaptaciones.</li> <li>Especifique cuántos autores de la revisión han evaluado la certeza del cuerpo de la evidencia para un desenlace, si varios autores de la revisión han trabajado de manera independiente, y sobre los procesos utilizados para resolver los desacuerdos entre los evaluadores.</li> <li>Especifique los procesos utilizados para obtener o confirmar datos por parte de los autores del estudio.</li> <li>Si se ha utilizado una herramienta de automatización para apoyar la evaluación de la certeza, describa cómo se utilizó la herramienta de automatización y cómo se habilitó, y sobre los detalles acerca del rendimiento y la validación interna de la herramienta.</li> <li>Describa los métodos para la presentación de los resultados de las evaluaciones de la certeza, como el uso de tablas de resumen de los hallazgos.</li> <li>Si se han utilizado frases estándar que incorporen la certeza de la evidencia (por ejemplo, «los protectores de cadera <i>probablemente</i> reducen discretamente el riesgo de fractura de cadera»), describa la interpretación prevista de cada frase y la referencia de la fuente.</li> </ul> |
| <b>RESULTADOS</b>                         |     |                                                                                                                                                                                                                                                                                                                                                                                                                                                                                                                                                                                                                                                                                                                                                                                                                                                                                                                                                                                                                                                                                                                                                                                                                                                                                                                                                                                                                                                                                                                                                                                                                                                                                                                                                                                                                                                                                                                                                                                                                                                                                                                                                                                                                                                                                                     |
| SELECCIÓN DE ESTUDIOS (flujo de estudios) | 16a | <ul style="list-style-type: none"> <li>Especifique, idealmente mediante un diagrama de flujo, el número de registros identificados, registros excluidos antes del cribado, registros cribados, registros excluidos después del cribado por título o título y resumen, publicaciones recuperadas a texto completo para una evaluación detallada, publicaciones</li> </ul>                                                                                                                                                                                                                                                                                                                                                                                                                                                                                                                                                                                                                                                                                                                                                                                                                                                                                                                                                                                                                                                                                                                                                                                                                                                                                                                                                                                                                                                                                                                                                                                                                                                                                                                                                                                                                                                                                                                            |

| Sección                                      | N.º | Elementos recomendados para la presentación de publicaciones                                                                                                                                                                                                                                                                                                                                                                                                                                                                                                                                                                                                                                                                                                                                                      |
|----------------------------------------------|-----|-------------------------------------------------------------------------------------------------------------------------------------------------------------------------------------------------------------------------------------------------------------------------------------------------------------------------------------------------------------------------------------------------------------------------------------------------------------------------------------------------------------------------------------------------------------------------------------------------------------------------------------------------------------------------------------------------------------------------------------------------------------------------------------------------------------------|
|                                              |     | <p>potencialmente elegibles que no fueron recuperables, publicaciones recuperadas que no cumplieron con los criterios de inclusión y las razones principales de su exclusión, así como el número de estudios y publicaciones incluidas en la revisión. Si procede, indique también el número de estudios en curso y los informes asociados identificados.</p> <ul style="list-style-type: none"> <li>• Si la revisión es una actualización de una revisión anterior, especifique los resultados del proceso de búsqueda y selección de la revisión actual y especifique el número de estudios incluidos en la revisión previa.</li> <li>• Si procede, indique en el diagrama de flujo de PRISMA cuántos registros fueron excluidos por un revisor humano y cuántos por herramientas de automatización.</li> </ul> |
| SELECCIÓN DE ESTUDIOS (estudios excluidos)   | 16b | <ul style="list-style-type: none"> <li>• Enumere los estudios que podría parecer que cumplen con los criterios de inclusión, pero que finalmente fueron excluidos, y explique por qué fueron excluidos.</li> </ul>                                                                                                                                                                                                                                                                                                                                                                                                                                                                                                                                                                                                |
| CARACTERÍSTICAS DE LOS ESTUDIOS              | 17  | <ul style="list-style-type: none"> <li>• Enumere todos los estudios incluidos.</li> <li>• Presente las características clave de cada estudio en una tabla o figura (use preferiblemente un formato que facilite la comparación de las características a través de los estudios).</li> <li>• <i>Si en la revisión se evalúan los efectos de intervenciones, considere la posibilidad de presentar una tabla adicional que resuma los detalles de la intervención para cada estudio.</i></li> </ul>                                                                                                                                                                                                                                                                                                                 |
| RIESGO DE SESGO EN LOS ESTUDIOS INDIVIDUALES | 18  | <ul style="list-style-type: none"> <li>• Presente tablas o figuras que indiquen, para cada estudio, el riesgo de sesgo en cada dominio/componente/elemento evaluado (por ejemplo, cegamiento de los evaluadores de los desenlaces, datos faltantes de los desenlaces) y el riesgo de sesgo global a nivel de cada estudio.</li> <li>• Presente la justificación de cada riesgo de sesgo, por ejemplo, en forma de citas relevantes extraídas de los informes de los estudios incluidos.</li> <li>• <i>Si se han realizado las evaluaciones del riesgo de sesgo para desenlaces o resultados específicos en cada estudio, considere presentar las determinaciones del riesgo de sesgo en los gráficos de bosque (forest plot), junto a los resultados del estudio.</i></li> </ul>                                  |
| RESULTADOS DE LOS ESTUDIOS INDIVIDUALES      | 19  | <ul style="list-style-type: none"> <li>• Para todos los desenlaces, independientemente de que se haya realizado una síntesis estadística, presente para cada estudio el resumen estadístico para cada grupo (cuando proceda). Para los desenlaces dicotómicos, indique el número de participantes con y sin los eventos de cada grupo; o el número con el evento y el total de cada grupo (por ejemplo, 12/45). Para los desenlaces continuos, indique la media, la desviación estándar y el tamaño de la muestra de cada grupo.</li> </ul>                                                                                                                                                                                                                                                                       |

| Sección                                                               | N.º | Elementos recomendados para la presentación de publicaciones                                                                                                                                                                                                                                                                                                                                                                                                                                                                                                                                                                                                                                                                                                                                                                                                                                                                                                                                                                                                                                                                                                                                                                                                                       |
|-----------------------------------------------------------------------|-----|------------------------------------------------------------------------------------------------------------------------------------------------------------------------------------------------------------------------------------------------------------------------------------------------------------------------------------------------------------------------------------------------------------------------------------------------------------------------------------------------------------------------------------------------------------------------------------------------------------------------------------------------------------------------------------------------------------------------------------------------------------------------------------------------------------------------------------------------------------------------------------------------------------------------------------------------------------------------------------------------------------------------------------------------------------------------------------------------------------------------------------------------------------------------------------------------------------------------------------------------------------------------------------|
|                                                                       |     | <ul style="list-style-type: none"> <li>• Para todos los desenlaces, independientemente de que se haya realizado una síntesis estadística, presente para cada estudio una estimación del efecto y su precisión (por ejemplo, el error estándar o el intervalo de confianza/credibilidad del 95 %). Por ejemplo, para los desenlaces del tiempo transcurrido hasta el evento, presente un cociente de riesgos (<i>hazard ratio</i>) y su intervalo de confianza.</li> <li>• Si los datos a nivel de estudio se presentan visualmente o se incluyen en el texto (o ambos), también presente los resultados en un formato tabular.</li> <li>• Si los resultados se han obtenido de múltiples fuentes de datos (por ejemplo, artículo de revista, entrada del registro del estudio, informe del estudio clínico, correspondencia con los autores), indique la fuente de los datos.</li> <li>• Si procede, indique qué resultados no se reportaron directamente y tuvieron que ser computados o estimados a partir de otra información.</li> </ul>                                                                                                                                                                                                                                       |
| RESULTADOS DE LA SÍNTESIS (características de los estudios incluidos) | 20a | <ul style="list-style-type: none"> <li>• Proporcione un breve resumen de las características y el riesgo de sesgo de los estudios que contribuyen a cada síntesis (metanálisis u otro). El resumen debe centrarse únicamente en las características del estudio que ayuden a interpretar los resultados (especialmente aquellos que sugieren que la evidencia aborda solamente una parte de la pregunta de la revisión, o se refieren indirectamente a la pregunta).</li> <li>• Indique qué estudios fueron incluidos en cada síntesis (por ejemplo, enumere cada estudio en un gráfico de bosque (<i>forest plot</i>) o tabla o cite los estudios en el texto).</li> </ul>                                                                                                                                                                                                                                                                                                                                                                                                                                                                                                                                                                                                        |
| RESULTADOS DE LA SÍNTESIS (resultados de las síntesis estadísticas)   | 20b | <ul style="list-style-type: none"> <li>• Indique los resultados de todas las síntesis estadísticas descritas en el protocolo y todas las síntesis realizadas que no se han especificado previamente.</li> <li>• Si se ha realizado un metanálisis, indique para cada uno: <ul style="list-style-type: none"> <li>○ el estimador de resumen y su precisión (por ejemplo, error estándar o intervalo de confianza/credibilidad del 95 %), y</li> <li>○ las medidas de heterogeneidad estadística (por ejemplo, <math>\tau^2</math>, <math>I^2</math>, intervalo de predicción).</li> </ul> </li> <li>• Si se han utilizado otros métodos de síntesis estadística (por ejemplo, estimaciones de los efectos resumidos combinando valores de P), indique el resultado sintetizado y su medida de precisión (o información equivalente, por ejemplo, el número de estudios y el tamaño total de la muestra).</li> <li>• Si el método de síntesis estadística no aporta una estimación del efecto (por ejemplo, como ocurre cuando se combinan los valores de P), indique los estadísticos relevantes (por ejemplo, el valor de P de la prueba estadística), junto con una interpretación del resultado que sea coherente con la pregunta abordada por el método de síntesis.</li> </ul> |

| Sección                                                                        | N.º | Elementos recomendados para la presentación de publicaciones                                                                                                                                                                                                                                                                                                                                                                                                                                                                                                                                                                                                                                                                                                                                                                                                                                                                                                                                                                                                                                                                                                                                                                                                                                                                                                                                                                                                                                                                                                                                                                                                                                       |
|--------------------------------------------------------------------------------|-----|----------------------------------------------------------------------------------------------------------------------------------------------------------------------------------------------------------------------------------------------------------------------------------------------------------------------------------------------------------------------------------------------------------------------------------------------------------------------------------------------------------------------------------------------------------------------------------------------------------------------------------------------------------------------------------------------------------------------------------------------------------------------------------------------------------------------------------------------------------------------------------------------------------------------------------------------------------------------------------------------------------------------------------------------------------------------------------------------------------------------------------------------------------------------------------------------------------------------------------------------------------------------------------------------------------------------------------------------------------------------------------------------------------------------------------------------------------------------------------------------------------------------------------------------------------------------------------------------------------------------------------------------------------------------------------------------------|
|                                                                                |     | <ul style="list-style-type: none"> <li>• Si se han comparado grupos, describa la dirección del efecto (por ejemplo, menos eventos en el grupo de intervención o mayor dolor en el grupo de comparación).</li> <li>• Si se sintetizan diferencias de medias, especifique para cada síntesis, cuando proceda, la unidad de medición (por ejemplo, kilogramos o libras para el peso), los límites superior e inferior de la escala de medición (por ejemplo, los anclajes oscilan entre 0 y 10), la dirección del beneficio (por ejemplo, las puntuaciones más altas denotan una mayor gravedad del dolor) y la diferencia mínima importante, si se conoce. Si se sintetizan las diferencias de medias estandarizadas y se vuelve a expresar la estimación del efecto para un instrumento en particular, es necesario que especifique los detalles del instrumento, así como la diferencia de medias utilizada.</li> </ul>                                                                                                                                                                                                                                                                                                                                                                                                                                                                                                                                                                                                                                                                                                                                                                            |
| RESULTADOS DE LA SÍNTESIS (resultados de investigaciones de la heterogeneidad) | 20c | <ul style="list-style-type: none"> <li>• Si se han realizado investigaciones sobre las posibles causas de heterogeneidad: <ul style="list-style-type: none"> <li>○ presente los resultados independientemente de la significación estadística, la magnitud o la dirección de la modificación del efecto,</li> <li>○ identifique los estudios que contribuyen a cada subgrupo, e</li> <li>○ indique los resultados teniendo en cuenta la naturaleza observacional del análisis y el riesgo de confusión (<i>confounding</i>) debido a otros factores.</li> </ul> </li> <li>• Si se han realizado análisis por subgrupos: <ul style="list-style-type: none"> <li>○ indique, para cada análisis, el valor exacto de P de una prueba de interacción, así como, dentro de cada subgrupo, los estimadores de resumen, su precisión (por ejemplo, el error estándar o el intervalo de confianza/credibilidad del 95 %) y las medidas de heterogeneidad, y</li> <li>○ <i>considere presentar la estimación de la diferencia entre subgrupos y su precisión.</i></li> </ul> </li> <li>• Si se ha realizado una metarregresión: <ul style="list-style-type: none"> <li>○ Indique, para cada análisis, el valor exacto de P del coeficiente de regresión y su precisión, y</li> <li>○ <i>considere presentar un diagrama de dispersión de metarregresión (meta-regression scatterplot) con las estimaciones del efecto del estudio representadas por el potencial modificador del efecto.</i></li> </ul> </li> <li>• Si se han utilizado métodos informales (es decir, los que no involucren una prueba estadística formal) para investigar la heterogeneidad, describa los resultados observados.</li> </ul> |
| RESULTADOS DE LA SÍNTESIS (resultados de análisis de sensibilidad)             | 20d | <ul style="list-style-type: none"> <li>• Si se han realizado análisis de sensibilidad: <ul style="list-style-type: none"> <li>○ indique los resultados de cada análisis de sensibilidad,</li> <li>○ comente cómo se le dio robustez al análisis principal en virtud de los análisis de sensibilidad correspondientes,</li> </ul> </li> </ul>                                                                                                                                                                                                                                                                                                                                                                                                                                                                                                                                                                                                                                                                                                                                                                                                                                                                                                                                                                                                                                                                                                                                                                                                                                                                                                                                                       |

| Sección              | N.º | Elementos recomendados para la presentación de publicaciones                                                                                                                                                                                                                                                                                                                                                                                                                                                                                                                                                                                                                                                                                                                                                                                                                                                                                                                                                                                                                                                                                                                                                                                                                                                                                                                                                                                                                                                                                                                                                                                                                                                                                                                                                                                                                                                                                                                                                                                                                                                                                                                                                                                                                                                                                                                                                                                                                                          |
|----------------------|-----|-------------------------------------------------------------------------------------------------------------------------------------------------------------------------------------------------------------------------------------------------------------------------------------------------------------------------------------------------------------------------------------------------------------------------------------------------------------------------------------------------------------------------------------------------------------------------------------------------------------------------------------------------------------------------------------------------------------------------------------------------------------------------------------------------------------------------------------------------------------------------------------------------------------------------------------------------------------------------------------------------------------------------------------------------------------------------------------------------------------------------------------------------------------------------------------------------------------------------------------------------------------------------------------------------------------------------------------------------------------------------------------------------------------------------------------------------------------------------------------------------------------------------------------------------------------------------------------------------------------------------------------------------------------------------------------------------------------------------------------------------------------------------------------------------------------------------------------------------------------------------------------------------------------------------------------------------------------------------------------------------------------------------------------------------------------------------------------------------------------------------------------------------------------------------------------------------------------------------------------------------------------------------------------------------------------------------------------------------------------------------------------------------------------------------------------------------------------------------------------------------------|
|                      |     | <ul style="list-style-type: none"> <li>○ considere presentar los resultados en tablas que indiquen: a) la estimación del efecto resumida, una medida de precisión (y otros estadísticos potencialmente relevantes, por ejemplo, el estadístico <math>I^2</math>) y los estudios que contribuyeron al metanálisis original, b) la misma información para el análisis de sensibilidad, y c) los detalles de las asunciones del análisis original y el análisis de sensibilidad, y</li> <li>○ considere presentar visualmente los resultados del análisis utilizando gráficos de bosque (forest plots).</li> </ul>                                                                                                                                                                                                                                                                                                                                                                                                                                                                                                                                                                                                                                                                                                                                                                                                                                                                                                                                                                                                                                                                                                                                                                                                                                                                                                                                                                                                                                                                                                                                                                                                                                                                                                                                                                                                                                                                                       |
| SESGOS EN EL INFORME | 21  | <ul style="list-style-type: none"> <li>• Presente evaluaciones del riesgo de sesgo debido a resultados faltantes (derivados de los sesgos en el informe) para cada síntesis evaluada.</li> <li>• Si se ha utilizado una herramienta para evaluar el riesgo de sesgo debido a resultados faltantes en una síntesis, presente las respuestas a las preguntas de la herramienta, las determinaciones sobre el riesgo de sesgo y la información utilizada para fundamentar dichas determinaciones.</li> <li>• Si se ha generado un gráfico de embudo (<i>funnel plot</i>) para evaluar los efectos de los estudios pequeños (una de las causas por las que existen sesgos en el informe), presente el gráfico y especifique la estimación del efecto y la medida de precisión utilizada en el gráfico. Si se ha generado un gráfico de embudo con contornos mejorados, especifique los «puntos de inflexión» de significación estadística que representan las líneas de contorno (<math>P = 0,01, 0,05, 0,1</math>, etc.).</li> <li>• Si se ha utilizado una prueba de asimetría en el gráfico de embudo, indique el valor exacto de <math>P</math> observado en la prueba y, potencialmente, de otros estadísticos pertinentes, por ejemplo, la desviación normal estandarizada, desde la cual se deriva el valor de <math>P</math>.</li> <li>• Si los análisis de sensibilidad pretendían explorar el impacto potencial de los resultados faltantes en la síntesis, presente los resultados de cada análisis (ver ítem n.º 20d), compárelos con los resultados del análisis primario e indique los resultados teniendo en cuenta debidamente las limitaciones del método estadístico.</li> <li>• Si los estudios han sido evaluados para la publicación no selectiva de los resultados mediante la comparación de los desenlaces y análisis especificados previamente en registros, protocolos y planes de análisis estadístico del estudio con los resultados que estuvieron disponibles en los informes del estudio, considere presentar una matriz (indicando los estudios en las filas y las síntesis en las columnas) para presentar la disponibilidad de los resultados del estudio.</li> <li>• Si una evaluación para la publicación no selectiva de los resultados revela que faltan algunos estudios en la síntesis, considere mostrar los estudios con los resultados faltantes debajo de un gráfico de bosque o incluir una tabla con los resultados de los estudios disponibles.</li> </ul> |

| Sección                                              | N.º | Elementos recomendados para la presentación de publicaciones                                                                                                                                                                                                                                                                                                                                                                                                                                                                                                                                                                                                                                                                                                       |
|------------------------------------------------------|-----|--------------------------------------------------------------------------------------------------------------------------------------------------------------------------------------------------------------------------------------------------------------------------------------------------------------------------------------------------------------------------------------------------------------------------------------------------------------------------------------------------------------------------------------------------------------------------------------------------------------------------------------------------------------------------------------------------------------------------------------------------------------------|
|                                                      |     | Describa todos los sesgos de publicación e indique cómo se determinaron (por ejemplo, sesgo de publicación, sesgo de desfase temporal, sesgo de notificación de resultados, etc.) y sus hallazgos.                                                                                                                                                                                                                                                                                                                                                                                                                                                                                                                                                                 |
| CERTEZA DE LA EVIDENCIA                              | 22  | <ul style="list-style-type: none"> <li>Indique el nivel global de certeza (o confianza) en el conjunto de pruebas para cada desenlace importante.</li> <li>Proporcione una explicación de las razones para disminuir o aumentar la calificación de la certeza de la evidencia (por ejemplo, en notas de pie de página en una tabla de resumen de la evidencia).</li> <li>Indique la certeza de la evidencia en todos los casos en los que se comuniquen los resultados (es decir, resumen, tablas de resumen de la evidencia, resultados, conclusiones) utilizando un formato apropiado para la sección de la revisión.</li> <li>Considere incluir tablas de resumen de la evidencia como, por ejemplo, las tablas GRADE de resúmenes de los hallazgos.</li> </ul> |
| <b>DISCUSIÓN</b>                                     |     |                                                                                                                                                                                                                                                                                                                                                                                                                                                                                                                                                                                                                                                                                                                                                                    |
| DISCUSIÓN (interpretación)                           | 23a | <ul style="list-style-type: none"> <li>Proporcione una interpretación general de los resultados en el contexto de otras evidencias.</li> </ul>                                                                                                                                                                                                                                                                                                                                                                                                                                                                                                                                                                                                                     |
| DISCUSIÓN (limitaciones de la evidencia)             | 23b | <ul style="list-style-type: none"> <li>Argumente las limitaciones de la evidencia incluida en la revisión.</li> </ul>                                                                                                                                                                                                                                                                                                                                                                                                                                                                                                                                                                                                                                              |
| DISCUSIÓN (limitaciones de los procesos de revisión) | 23c | <ul style="list-style-type: none"> <li>Argumente las limitaciones de los procesos de revisión utilizados y comente el potencial impacto de cada limitación.</li> </ul>                                                                                                                                                                                                                                                                                                                                                                                                                                                                                                                                                                                             |
| DISCUSIÓN (implicaciones)                            | 23d | <ul style="list-style-type: none"> <li>Argumente las implicaciones de los resultados para la práctica y la política.</li> <li>Haga recomendaciones explícitas para futuras investigaciones.</li> </ul>                                                                                                                                                                                                                                                                                                                                                                                                                                                                                                                                                             |
| <b>OTRA INFORMACIÓN</b>                              |     |                                                                                                                                                                                                                                                                                                                                                                                                                                                                                                                                                                                                                                                                                                                                                                    |
| REGISTRO Y PROTOCOLO (registro)                      | 24a | <ul style="list-style-type: none"> <li>Proporcione información del registro de la revisión, incluido el nombre y número de registro, o declare que la revisión no se ha registrado.</li> </ul>                                                                                                                                                                                                                                                                                                                                                                                                                                                                                                                                                                     |
| REGISTRO Y PROTOCOLO (protocolo)                     | 24b | <ul style="list-style-type: none"> <li>Indique dónde se puede acceder al protocolo de la revisión (por ejemplo, proporcionando una citación, DOI o un enlace), o declare que no se ha redactado ningún protocolo.</li> </ul>                                                                                                                                                                                                                                                                                                                                                                                                                                                                                                                                       |
| REGISTRO Y PROTOCOLO (enmiendas)                     | 24c | <ul style="list-style-type: none"> <li>Indique los detalles de cualquier enmienda a la información proporcionada en el registro o en el protocolo y señale: a) la enmienda propiamente dicha, b) la razón de la enmienda, y c) la etapa del proceso de la revisión en la que se aplicó la enmienda.</li> </ul>                                                                                                                                                                                                                                                                                                                                                                                                                                                     |

| Sección                                            | N.º | Elementos recomendados para la presentación de publicaciones                                                                                                                                                                                                                                                                                                                                                                                                                                                                                                                                                                                                                                                                                                                                                                                |
|----------------------------------------------------|-----|---------------------------------------------------------------------------------------------------------------------------------------------------------------------------------------------------------------------------------------------------------------------------------------------------------------------------------------------------------------------------------------------------------------------------------------------------------------------------------------------------------------------------------------------------------------------------------------------------------------------------------------------------------------------------------------------------------------------------------------------------------------------------------------------------------------------------------------------|
| FINANCIACIÓN                                       | 25  | <ul style="list-style-type: none"> <li>• Describa las fuentes de financiación o el apoyo no financiero de la revisión y especifique los números de identificación de las subvenciones pertinentes para cada financiador. Si no se ha recibido ningún apoyo financiero o no financiero específico, esto debe indicarse.</li> <li>• Describa el papel de los financiadores o patrocinadores (o ambos) en la revisión. Si los financiadores o patrocinadores no tuvieron ningún papel en la revisión, esto debe declararse.</li> </ul>                                                                                                                                                                                                                                                                                                         |
| CONFLICTO DE INTERESES                             | 26  | <ul style="list-style-type: none"> <li>• Declare las relaciones o actividades de los autores que los lectores puedan considerar pertinentes o que hayan influido en la revisión.</li> <li>• Si algún autor tiene un conflicto de intereses, informe cómo se trató en los determinados procesos de la revisión.</li> </ul>                                                                                                                                                                                                                                                                                                                                                                                                                                                                                                                   |
| DISPONIBILIDAD DE DATOS, CÓDIGO Y OTROS MATERIALES | 27  | <ul style="list-style-type: none"> <li>• Indique cuáles de los siguientes elementos están a disposición del público: plantillas de formularios de recopilación de datos, datos extraídos de los estudios incluidos, datos utilizados para todos los análisis, código analítico, cualquier otro material utilizado en la revisión.</li> <li>• Si alguno de los materiales mencionados está a disposición del público, especifique dónde se pueden encontrar (por ejemplo, proporcionando un enlace para los archivos depositados en un repositorio público).</li> <li>• Si los datos, códigos analíticos u otros materiales estarán disponibles a petición del interesado, proporcione los datos de contacto del autor responsable de compartir los materiales y describa en qué circunstancias se compartirán dichos materiales.</li> </ul> |
